# Supplementary material for: Quantitative Electroencephalography Markers for Accurate Diagnosis of Frontotemporal Dementia: A Spectral Power Ratio Approach
Source: Preprints.org preprint supplement (doi:10.20944/preprints202310.0170.v1), 2023-10-03
Supplement: Supplementary file 3 [file supplementary]

# Supplementary Material


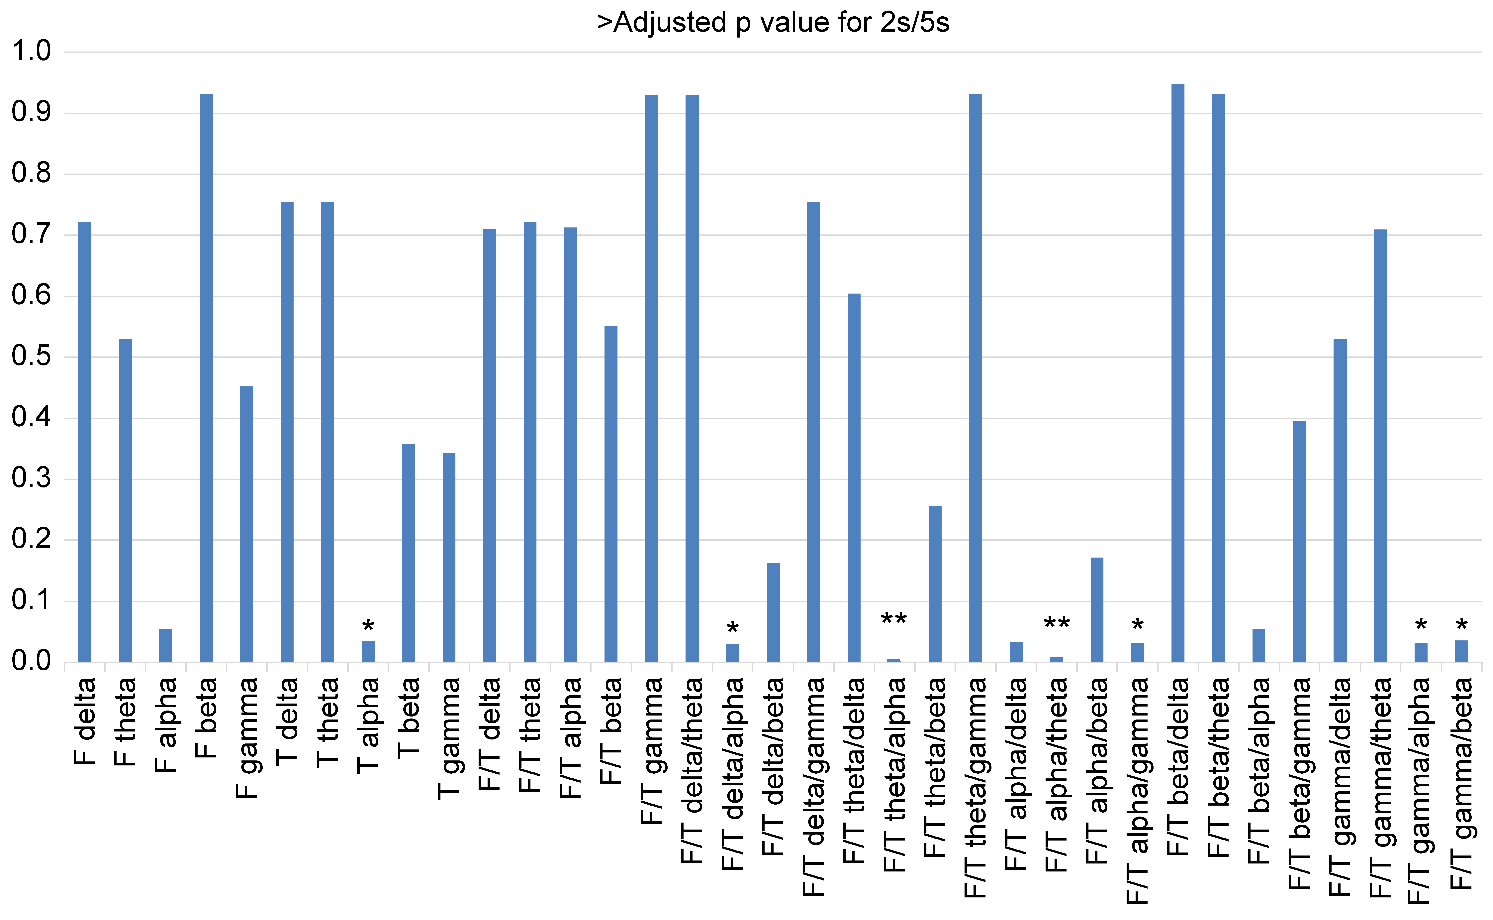


**Supplementary Figure S1**. Differences in spectral power ratio, expressed as adjusted p value, between FTD and CTL at 2s/5 step for FFT window length/step size per Hz. One and two asterisks represent p < 0.05 and p < 0.01, respectively. FFT: Fast Fourier Transform; FTD: frontotemporal dementia; CTL: control; F: frontal; T: temporal; F/T: frontal/temporal


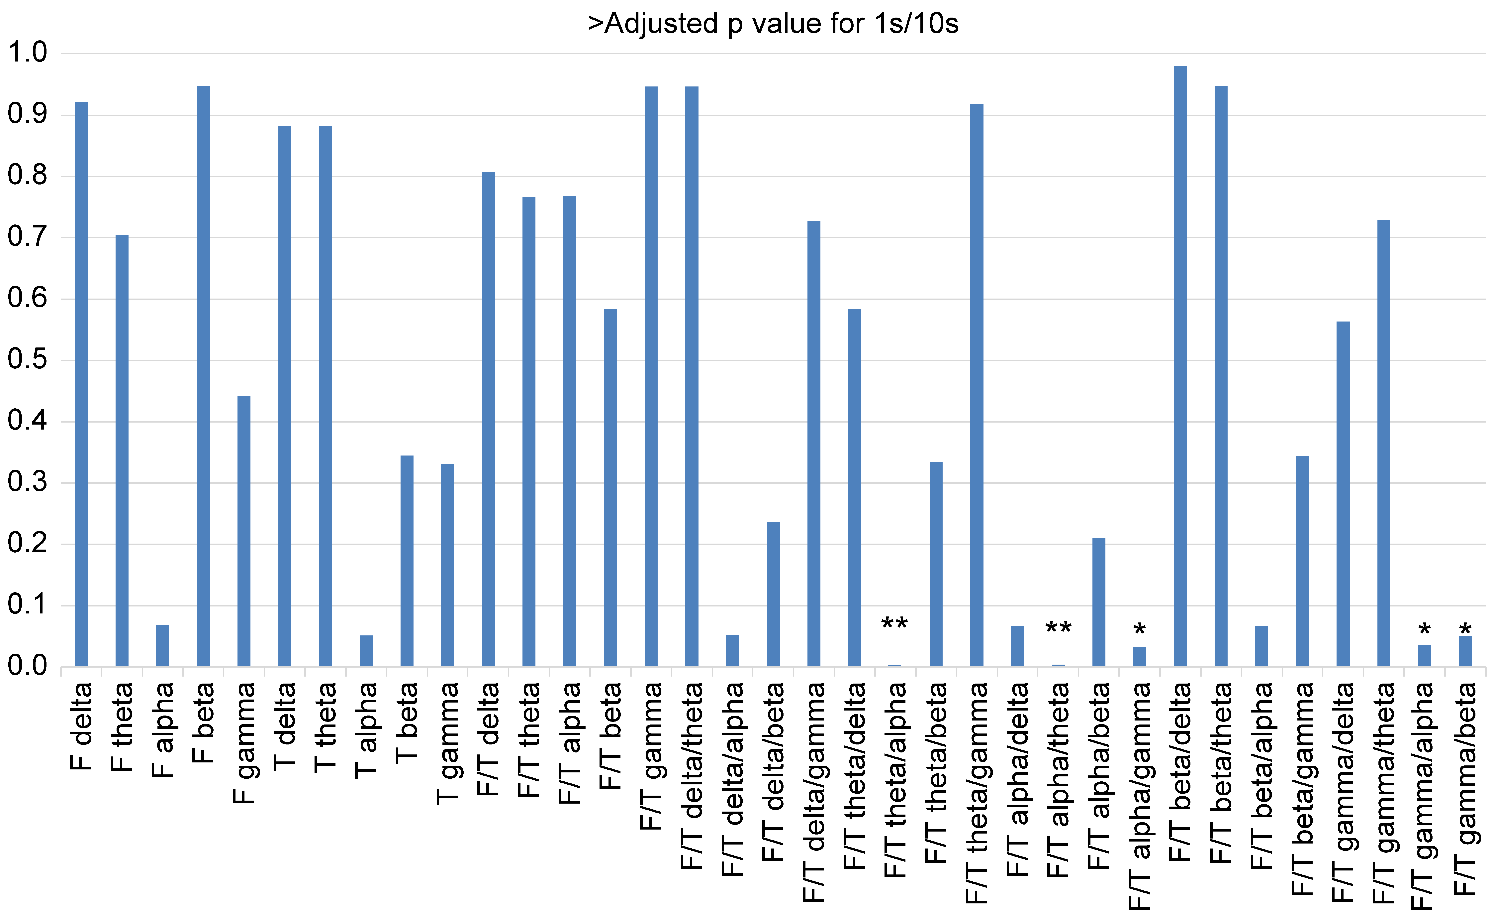


**Supplementary Figure S2**. Differences in spectral power ratio between FTD and CTL, expressed as adjusted p value, at 1s/10 step for FFT window length/step size per Hz. One and two asterisks represent p < 0.05 and p < 0.01, respectively. FFT: Fast Fourier Transform; FTD: frontotemporal dementia; CTL: control; F: frontal; T: temporal; F/T: frontal/temporal


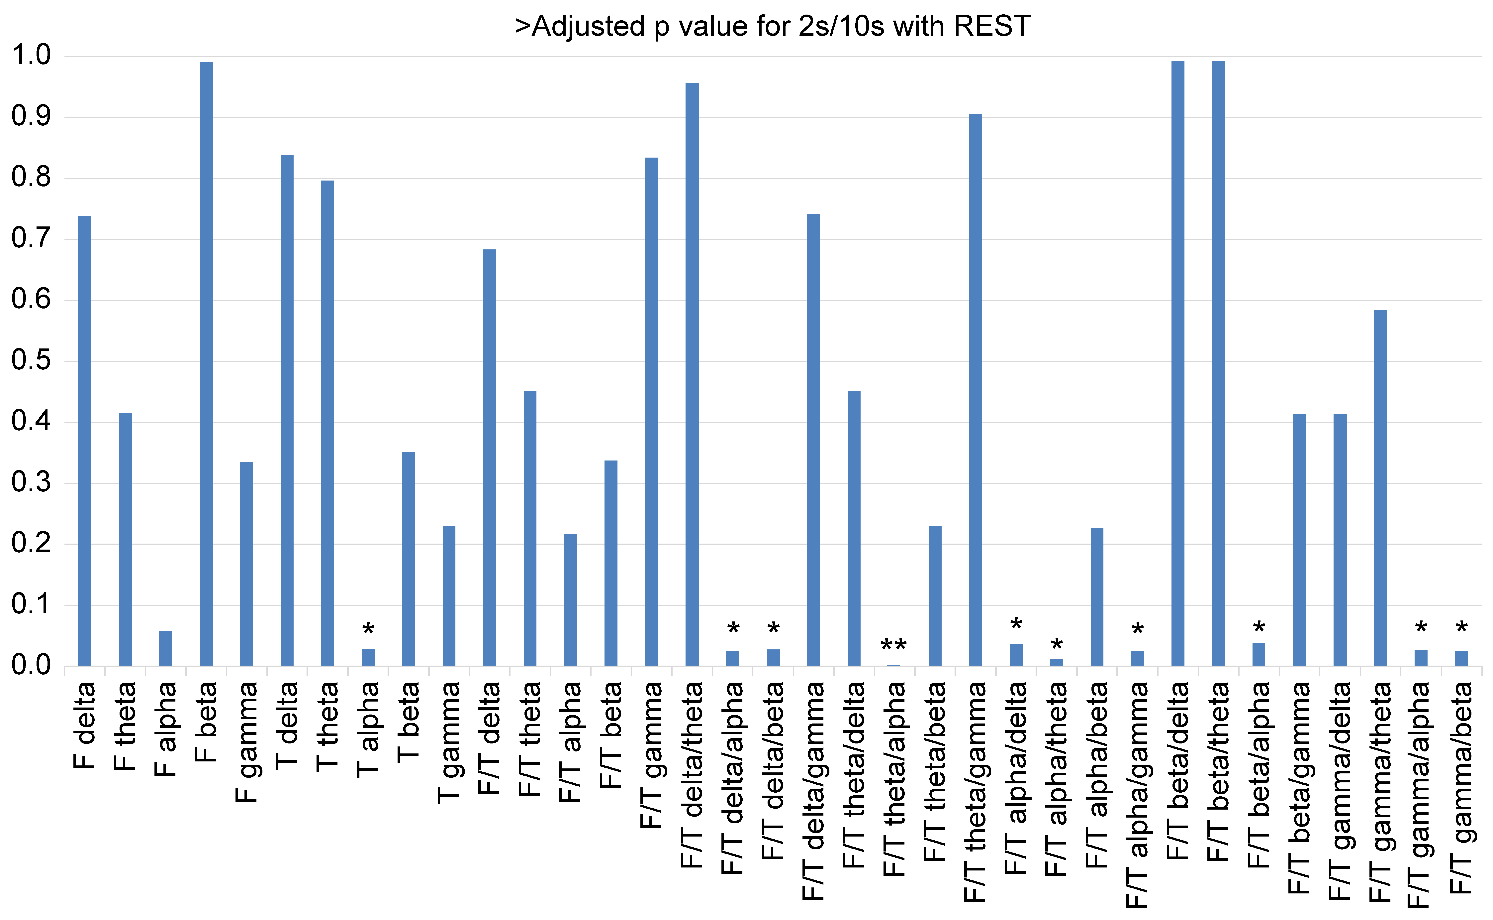


**Supplementary Figure S3**. Differences in spectral power ratio between FTD and CTL, expressed as p value, with infinity reference and at 2s/10 step for FFT window length/step size per Hz. One and two asterisks represent p < 0.05 and p < 0.01, respectively. FFT: Fast Fourier Transform; FTD: frontotemporal dementia; CTL: control; F: frontal; T: temporal; F/T: frontal/temporal
